# Supplementary material
Source: PubMed Central journal article supplement (PMC3193437)
Supplement: cr2010138x1.pdf [file cr2010138x1.pdf]

|                  |   |                                                   |
|------------------|---|---------------------------------------------------|
| S_cerevisiae     | 1 | MDTLE-----EPECPPHKNRIFVSS                         |
| S_paradoxus      | 1 | MDTLE-----EPECPPHKERIFVKS                         |
| S_mikata         | 1 | MRDTDAMVSKIIILNDILSLVYVGSICIRMDTLEEPECPEHEDRVFVKS |
| S_bayanus        | 1 | MDTLE-----EPEFPPHKPRVFVES                         |
| A_gossypii       | 1 | MQGE-----YQYISR                                   |
| S_castellii      | 1 | MSES-----CVFITIS                                  |
| K_waltii         | 1 | MSASPV-----NDIRYIHD                               |
| K_Lactis         | 1 | MEKYP-----YEYIPG                                  |
| S_kluyveri       | 1 | MQANA-----TEYKYIDS                                |
| V_polyspora_I    | 1 | MDHI-----TKFVTS                                   |
| V_polyspora_II   | 1 | MTT-----                                          |
| L_thermotolerans | 1 | MNSNLP-----SGLKYICD                               |
| Z_rouxii_XP      | 1 | MSSS-----CLYVDS                                   |
| C_glabrata       | 1 | M-----                                            |

|                  |    |                                                      |
|------------------|----|------------------------------------------------------|
| S_cerevisiae     | 21 | SKDFEGYP---SKAIVPVQFVAALTSIHLTE-TKCLLIGFSNFFERRGDQS  |
| S_paradoxus      | 21 | SKDFEGYP---SIAIVPVQFVALLTSIHLTE-TKCLLIGFSNFFGRDDQV   |
| S_mikata         | 51 | SKDFEGYA---SKAIVPVHFVALLTSIYLTE-TKGLLIVFSNFFEEGESQV  |
| S_bayanus        | 21 | AKEFESFP---DDAIVPVQFVSVLTSIRLITE-TKCLLIGFSNFFGGRDRM  |
| A_gossypii       | 11 | PAELLRFFS-SDDIVAQKVEFVAVLTRIVETPSTSCVLMQLQNFEGHRDD-  |
| S_castellii      | 11 | PSQFQRF---DSKQISLRFVSLLTGIKYNG-KNFIELELSDFDNINV--    |
| K_waltii         | 15 | AVELESFVS-DDQVVKQCIQEFVSVLTSIDFNPTQTRCLFQFKNFKNQDGG- |
| K_Lactis         | 12 | PECLNKYYQ-HGSIVSKPVHFISILSKVAYTKNDKCLFHEDNFTNGKAG-   |
| S_kluyveri       | 14 | PRDLEAYYS-NDEIVTHNIRFISVLTSLFIPNKKCLFIFQNFEGHRPD-    |
| V_polyspora_I    | 11 | SSQLIDLIENESEKANVYVEFVSLFTSLQYDSKTCFTLKEDESNSTLN-    |
| V_polyspora_II   | 4  | -----RQFYGLLTCIKVEE-NKFRLLTLHDG-----                 |
| L_thermotolerans | 15 | PLELKGFFS-EGEVLQRDIEFVSVLTSIDENPKSRCLFQFSNFRPGESV-   |
| Z_rouxii_XP      | 11 | PAQIGEIFV---N-CGCVRFVSLTSESRN-EFYCLEMNFAMGTPT-       |
| C_glabrata       | 2  | -----SIEITAVLTSISKDD-NGFHLALDDIAGEVRV-               |

|                  |    |                                                     |
|------------------|----|-----------------------------------------------------|
| S_cerevisiae     | 66 | QEDQYLIKLFKDRGSERLARITISLLCQYFDIELP-DLSDSGASPTVI    |
| S_paradoxus      | 66 | EEDQYLIKVKFKDRSSERLARMTISLLCQYFEIELP-DLSDSGSSSTVV   |
| S_mikata         | 96 | EKDQYIILKFKDRSSERLARMTISLLCQYFDIELP-DLSDG----STLI   |
| S_bayanus        | 66 | -GQRYTVKLFKFKDSAERLARMTISLVCRYFDIELP-DSDLGTESCPAEL  |
| A_gossypii       | 59 | -RIPYVVKLPCRTWEQSQLVAIVLKLMLHGFGLDTE-KVGDE----SGFD  |
| S_castellii      | 54 | -ISPYRVKLRCSDENAKRLAQMISLLCQFFDFEIP-ELRTL---SDEFF   |
| K_waltii         | 63 | -DFDYTCIKSCNSAETLNLTKLTLSLFAQQFDLELT-DLDNP---EGFC   |
| K_Lactis         | 60 | -LNTYCGKIKNKSFECDVLLRMVLSLFEKLGMQIA-GLDYS---SDFV    |
| S_kluyveri       | 62 | -ECPYTAKIRCDAETSTLTRMMLSLIAQQFDLDLP-DLDDP---SGFH    |
| V_polyspora_I    | 60 | -SSPFVVFQEP--FSS-DTRTKVLRLCDKEDIDLPIDFNSE---SPSFS   |
| V_polyspora_II   | 28 | -DHLYSIFI--SDDPKNYQVAKICASLICRFYNIETIE-FEK-----QFYQ |
| L_thermotolerans | 63 | -SPDYTCIKTCNNVETLNLTKLTLSLVSOQFDLDFP-DLINDA---EGFY  |
| Z_rouxii_XP      | 54 | -SIPYRPIPKRHADSARSAKMVIELICNWNLDIP-ELQN---GITFI     |
| C_glabrata       | 33 | -L-----D-----IDEAQAREVVNECDLEVS---D---TNAEN         |

|                  |     |                                                    |
|------------------|-----|----------------------------------------------------|
| S_cerevisiae     | 115 | LRDIHLERLCFSSCKALYVSK---HGNY-----TLFLEDIKPLDL      |
| S_paradoxus      | 115 | LRDIHLERLCFSSCKALYVSK---HGNY-----TLFLEDIKPLDL      |
| S_mikata         | 141 | LKDIHLERLCFSSCKALYVSR---SGNY-----TLFLEDIKPLDI      |
| S_bayanus        | 114 | LEDIHFERLCFSSCKTLYVSR---HGNY-----TLFLEDIKPLDL      |
| A_gossypii       | 103 | LADIHIKHLCFARCRGKFITN---DKNG-----SILLDEILGIDI      |
| S_castellii      | 99  | IDFIQLDRLCFINCKVIYIGK---DDKY-----SLFLDDIKPIDL      |
| K_waltii         | 107 | INEMHLDKLCFVCKGTFVSC---NNKG-----GIFVQRLRVIDL       |
| K_Lactis         | 104 | LEFLEKRYMCMISVKGLFITA---YDKA-----SLQIHEIKLLDL      |
| S_kluyveri       | 106 | LRGIYFERLCFVKCQGRFVST---KNKG-----SIFLQDIRCIDL      |
| V_polyspora_I    | 103 | IENIYLEKLCFVNCIGRYAYN---GIHP-----VVFAEKIRPISL      |
| V_polyspora_II   | 69  | FAAIHLTKICILQLQV-YNSK---N-----SIDDIKPLNL           |
| L_thermotolerans | 107 | MKDIHLEKLCFVCKGTFVTC---DNKG-----GIFLQGLRIIDI       |
| Z_rouxii_XP      | 98  | KNRIHTQCLCFLECKVLYMAT---PSESSQNQPFEDPYLGYLESVKELSF |
| C_glabrata       | 59  | ITKIQLKLCFVVAKCTSSGLQLVNGDMT-----FKLQPVVQVLDI      |

OB1

|                  |     |                              |                           |
|------------------|-----|------------------------------|---------------------------|
| S_cerevisiae     | 152 | VSVVISTISTKSTNSSK-HSSSELI    | SECDLNNSLVDFNNLIEMNRDEKNR |
| S_paradoxus      | 152 | VNVIRTISTKSKKGSSEHLLEPTSKCNL | KRSLVDFNNLIEMNRDEKNS      |
| S_mikata         | 178 | VNVINSISTKSKSGTEFLPSGPIIESNL | REPLLDIFNNLIKMNIDERNS     |
| S_bayanus        | 151 | AYVINTISKGPKISSNGVCLAPNAGPEL | KKSLAAIFDNLIAMNRDQKNS     |
| A_gossypii       | 140 | DKELRNEAAGSQRLS-----         | NEDWGVVNKITDNLIRLDRDSSHR  |
| S_castellii      | 136 | NNAIRIARQLQST-----           | LEQRTILKIFDNLIKLNNSRNG    |
| K_waltii         | 144 | HSTLFDDEKSKQK-----           | DNIMGTLQATFDNLMKLNDSKAQ   |
| K_Lactis         | 141 | KSYFDQSTAD--EY-----          | KLKPSIEKLFNNLLKREK--RNAD  |
| S_kluyveri       | 143 | NGTLYTARTF--KES-----         | N-EITTLNRIFDNLIIRLNNDPKND |
| V_polyspora_I    | 140 | PSVMKLLTNKTVN-----           | ETAFSLSSIFDNLINLNSNSNRS   |
| V_polyspora_II   | 100 | ETVTRFVKSG-----              | NEEVNIIKYLIDLDQDSTES      |
| L_thermotolerans | 144 | HSSLFDPTKRDER-----           | SSISSETVRVIFDNLVKLNDSKAQ  |
| Z_rouxii_XP      | 145 | TQAQELALE-AST-----           | DVGKTIKRSILQNLQQLMHQNGSIG |
| C_glabrata       | 101 | NYIQENWNTLDK-----            | KKKDKISKILLALKKLDSDIKSE   |

$\alpha$ D

$\alpha$ E

|                  |     |                             |                         |
|------------------|-----|-----------------------------|-------------------------|
| S_cerevisiae     | 201 | FKFVKLIHYDIE-LKKFVQIQ-----  | QKVLISQKSKAA-----       |
| S_paradoxus      | 202 | FKFVKLIHYDIE-LKRFIQEQ-----  | QNILSQKLIKAK-----       |
| S_mikata         | 228 | FKFVRLIHYNTE-LKRFIQEQ-----  | QSLLSQKSKTK-----        |
| S_bayanus        | 201 | FKFVKLTHYDIE-FKEFIQER-----  | QRLLSQKAKPS-----        |
| A_gossypii       | 179 | FNFNLAHSTRQ-FIDYLYKYR-----  | TERLTQVD--L-----        |
| S_castellii      | 172 | FKFVKLDNYNNE-FAQFIQEK-----  | QTMVNSRKKTT-----        |
| K_waltii         | 181 | FKFVKLQNYDLE-MRRYVQCR-----  | QEALLKL-K-----          |
| K_Lactis         | 176 | FQFKSLTSYCTE-MQSYLDSLVLQEA  | PTRLIPKENTA-----        |
| S_kluyveri       | 179 | FKFVKLLNYDHD-MKKFIQNR-----  | QENLALTN--F-----        |
| V_polyspora_I    | 176 | FKFVLELENYEPK-FGEFIQGR----- | QQNLAVQLK-----          |
| V_polyspora_II   | 131 | FSFDEIPFALPEDFVLVIDSL-----  | KS-----                 |
| L_thermotolerans | 181 | FKFVKLQNYDTA-MRKYIQSR-----  | QESMLSL-K-----          |
| Z_rouxii_XP      | 180 | FNSNLIQQQQQQ-QQQQQQQQ-----  | QQLLLLQEQSEPKQVSQSTQQSS |
| C_glabrata       | 136 | FNFKVLLNRYKNT-LVHFLSGI----- | KM--TKQTK-----          |

$\alpha$ F

$\alpha$ G

|                  |     |                            |                          |
|------------------|-----|----------------------------|--------------------------|
| S_cerevisiae     | 232 | -----                      | AINPFFVFNRL              |
| S_paradoxus      | 233 | -----                      | AINPFFAPNRL              |
| S_mikata         | 259 | -----                      | LINPFFAPNRL              |
| S_bayanus        | 232 | -----                      | AVDFFVFNRL               |
| A_gossypii       | 208 | -----                      | RMNPMFGANQL              |
| S_castellii      | 203 | -----                      | IINNPLFRSHIT             |
| K_waltii         | 209 | -----                      | EKNPLFGLSRI              |
| K_Lactis         | 213 | -----                      | IVNPLFQLGLQ              |
| S_kluyveri       | 208 | -----                      | RKNPIFGVNRY              |
| V_polyspora_I    | 205 | -----                      | LKNPLFSASRG              |
| V_polyspora_II   | 154 | -----                      | NEL                      |
| L_thermotolerans | 209 | -----                      | EKNPLFGLLKP              |
| Z_rouxii_XP      | 223 | ISSQSENHNSRTSTSNQSHYQNSFRS | INSGSNNTPTTLASTNPIIFGNRL |
| C_glabrata       | 163 | -----                      | ITSFETKO--               |

|                  |     |                     |                    |                 |    |
|------------------|-----|---------------------|--------------------|-----------------|----|
| S_cerevisiae     | 243 | GIP---YIESQNEFNSQLM | TLNVDEPTT-----D    |                 |    |
| S_paradoxus      | 244 | GIP---YLESQNEFNSQLM | TLNVDEPIT-----E    |                 |    |
| S_mikata         | 270 | GIP---YVETQNEFNSQLM | TLNSEQPIT-----D    |                 |    |
| S_bayanus        | 243 | GAP---SLESQNEFNSQLM | TLNADEEVP-----N    |                 |    |
| A_gossypii       | 219 | -LC---MKESQDDFN     | SQQDDPYFNS-----    |                 |    |
| S_castellii      | 216 | DTRE-NEMTSQDFDN     | SQYLNTENSNDST----- |                 |    |
| K_waltii         | 220 | H-A---DHDSQNDFDSQ   | IPDTSNIGFTLHDSEKHS | A-----EI        |    |
| K_Lactis         | 224 | REV---NNSDFNEFDSQ   | TQQHNIPT-----LPL   | -----QS         |    |
| S_kluyveri       | 219 | -LS---AQESQDDFDSQ   | RMETQSTLFGFTALGH   | DNPTDIQQTHSKHSP | PG |
| V_polyspora_I    | 216 | YQDSCKDFDSMREFESQ   | CNDSSVKEEPT-----   |                 |    |
| V_polyspora_II   | 157 | SFL---SRE-SSGFNGQ   | VKSEI-DDEYF-----D  |                 |    |
| L_thermotolerans | 220 | R-A---DHDSQNDFDSQ   | LPDPSNLDNAIFYGHR   | IPS-----ES      |    |
| Z_rouxii_XP      | 273 | I-----TVESQLDFNS    | I--NTQNDELYE-----  |                 |    |
| C_glabrata       | 171 | -TT---MVESQNDFNSQ   | AMNTQQFTSQA-----   |                 |    |

OB1

RD

S\_cerevisiae 269 IISNMGEEEMHDSADPI-----EDSDSSTT-SSTGKY-----  
 S\_paradoxus 270 IGDKGDNMHDSADPI-----EDSDSSTT-SSTGKY-----  
 S\_mikata 296 ISSNGDDMRYSADPI-----EEDSSTI-SSTGKF-----  
 S\_bayanus 269 TSGRKDDPDASSDPI-----EDSDASSSSSSTGTF-----  
 A\_gossypii 240 -AEQLHTGFSLPNPL-----EETAAVSS-GYPQ-----GV  
 S\_castellii 243 -----SPSHDSIDPI-----EESDANSSS-----IH-----  
 K\_waltii 255 LISTT-DS-LAFDRI-----EDSENSRLTTSTT-----SY  
 K\_Lactis 251 ISSNPDG--E-ADQVAKESTKTAIESDTPOF-SLE-----QN  
 S\_kluyveri 265 LSGTLHDT-STEDLI-----EESDSSTT-S-EFMA-----TP  
 V\_polyspora\_I 244 -----TSL-----FNNES-----GY-----  
 V\_polyspora\_II 181 T-----AQSS-VS-----  
 L\_thermotolerans 255 LDSQT-PNLVSSSEII-----EEGQSPSVAGAAGTPAALSGSNKPSSY  
 Z\_rouxii\_XP 294 -----VELEPTPEPK-----RKEIIRTVS-----SP  
 C\_glabrata 195 -----SIPGISDDEL-----IDSDDDLNDNISEGSY-----PT----

S\_cerevisiae 298 FSSKS-----Y-----  
 S\_paradoxus 299 FSSRS-----Y-----  
 S\_mikata 325 VSPGS-----C-----  
 S\_bayanus 299 LSSRS-----Y-----  
 A\_gossypii 268 --V-T-----EPKADSPVELP--STEHGRSYTRDERPVLMSQPISR---  
 S\_castellii 264 LSRNT-----S-----  
 K\_waltii 283 GSS--A-----V-----  
 K\_Lactis 285 PCNDSI-----  
 S\_kluyveri 293 VSFRSCRNNTKNTADPPKVVRPDLTTSNSRHLQSSSEESGLPLNPGESNLL  
 V\_polyspora\_I 254 KSREA-----S-----  
 V\_polyspora\_II 188 -----  
 L\_thermotolerans 296 QGSGSL-----S-----  
 Z\_rouxii\_XP 315 MGKSS-----S-----  
 C\_glabrata 195 -----SIPGISDDEL-----IDSDDDLNDNISEGSY-----PT----

S\_cerevisiae 304 -----IQSQTPERKTS-----VPNNWHD--  
 S\_paradoxus 305 -----IQSQTPERKTS-----VPNNWHD--  
 S\_mikata 331 -----IQSHTPERKTS-----VPNNWLD--  
 S\_bayanus 305 -----IQSQTPERKTK-----VPNNWLD--  
 A\_gossypii 305 -----IMQLT--NSSKRK-Q-----MPHS---P-  
 S\_castellii 270 -----R-----Q-----  
 K\_waltii 288 -----IRA-TPTSQNTDDTLASDSTMGTFPGGRANVPQKRG--  
 K\_Lactis 291 -----IQSAKEQKRPI-----GSNKGMS  
 S\_kluyveri 343 FQRNVYTRITAMIAEHSKERESA-----IARR---AS  
 V\_polyspora\_I 260 -----D-----EE-----FD--  
 V\_polyspora\_II 188 -----QIQRPAT-SS-----AFETFRN--  
 L\_thermotolerans 303 -----ISQISPPRETE-----YVRLSRD--  
 Z\_rouxii\_XP 321 -----F-----LE-----SG--  
 C\_glabrata 228 -----T-----KHD-----IPTNHNG-

S\_cerevisiae 322 -D-----  
 S\_paradoxus 323 -D-----  
 S\_mikata 349 -N-----  
 S\_bayanus 323 -R-----  
 A\_gossypii 322 --LST-----  
 S\_castellii 272 -----  
 K\_waltii 323 -F--SSH--EKAQLLELISSDEDDDKLSSGDEAISELRLRAQSGSDSHF  
 K\_Lactis 311 DFIS-----  
 S\_kluyveri 372 NVVMS-----  
 V\_polyspora\_I 265 -----  
 V\_polyspora\_II 204 -V-----  
 L\_thermotolerans 321 -F--ETSAIESNKRSVVTSQEIIRDDSSLLDDDDILEFSLSTHS-VDKNEL  
 Z\_rouxii\_XP 326 -----  
 C\_glabrata 239 -----

RD

|                  |     |                            |           |         |                       |
|------------------|-----|----------------------------|-----------|---------|-----------------------|
| S_cerevisiae     | 323 | ----D-----                 | SGSKR--   | KRKLS   | -----                 |
| S_paradoxus      | 324 | ----D-----                 | SGRNK--   | KRKLS   | -----                 |
| S_mikata         | 350 | ----D-----                 | SEGKN--   | KRRLS   | -----                 |
| S_bayanus        | 324 | ----T-----                 | S-ERK--   | KRKLS   | -----                 |
| A_gossypii       | 325 | ----HS----                 | APCDGNTKR |         | -----PT               |
| S_castellii      | 272 | ----S-----                 | ITTER--   | SPKLR   | -----                 |
| K_waltii         | 368 | NYM-NS-----                | SSPNI--   | KRARS   | -----                 |
| K_Lactis         | 315 | -----                      | SGTVK--   | KIKLTDL | GALTHHRQVTRQDLDISYQLP |
| S_kluyveri       | 377 | ----QSIPDITPKNGTNTQDDRALHR |           |         | -----SNFQPE           |
| V_polyspora_I    | 265 | ----P-----                 | NPPKR--   | QKSV    | -----                 |
| V_polyspora_II   | 205 | ----E-----                 | RNLSK--   | KRKLS   | -----                 |
| L_thermotolerans | 367 | SQTSRG-----                | SQPTS--   | KRQRI   | -----                 |
| Z_rouxii_XP      | 326 | ----P-----                 | SPPKR--   |         | -----L                |
| C_glabrata       | 239 | ----S-----                 | SANKH--   | SKKDS   | -----                 |

RD

|                  |     |                                     |                              |                 |                 |
|------------------|-----|-------------------------------------|------------------------------|-----------------|-----------------|
| S_cerevisiae     | 334 | -----                               | FHS-PNAS                     | SIRKATSYEQ--    | LSLASVGSVE-RLEG |
| S_paradoxus      | 335 | -----                               | FQG-PSAPLSQKATSYER--         | LSLANVGSVE-RLEG |                 |
| S_mikata         | 361 | -----                               | FQC-TSAPSSQQVIDYER--         | LSLAKVGSVE-RLKG |                 |
| S_bayanus        | 334 | -----                               | FTD-RTAPSSQLGIDYER--         | LSLASLGSME-TFEG |                 |
| A_gossypii       | 338 | -LPLVPDDA-TGKRKRTS-TTAGVVETALTIDT-- | LENSEEGKLV-STTG              |                 |                 |
| S_castellii      | 283 | -----                               | KLN-KNSKPVA--NKPEY--         | YRCVDIGTIC-EIQG |                 |
| K_waltii         | 383 | -----                               | AFSEKPPP-SD--VGF-C--         | IPNISSGECV-ILRG |                 |
| K_Lactis         | 349 | YDPIISSQS-QFEQPTI-QEEGSDPFDLKPD--   | SISKAITDRLYHISDG             |                 |                 |
| S_kluyveri       | 405 | PSTVTSTDTNEQLKKRQK-LDIPTLHIAVFPEILS | L VHASPNTF-RLQG              |                 |                 |
| V_polyspora_I    | 275 | -----                               | VN-ETSDDVKKWGSNDI--          | MNSSRIGERY-TVEG |                 |
| V_polyspora_II   | 216 | -----                               | EIVTSPAPIVAK--SSV--          | FIDAPLGEVH-SITG |                 |
| L_thermotolerans | 383 | -----                               | QMLGNISQ-KD--PNS-Y--         | MFHASLDEPL-IISG |                 |
| Z_rouxii_XP      | 333 | -----                               | KRS-----RTRIDPAI--           | LNAEESDIF-ELKG  |                 |
| C_glabrata       | 250 | -----                               | CLYVNFMDPHRNQLWTYNG--DNS---- | SVI-ISHC        |                 |

|                  |     |                                                    |              |
|------------------|-----|----------------------------------------------------|--------------|
| S_cerevisiae     | 365 | KIVGMNPPQFASINEFK-YC-TLKLYFTQL-LPN----             | V-PDKVLVPGV  |
| S_paradoxus      | 366 | KFVGMYPPTQFASINEFK-YC-TLKLYYTHLPLSN----            | I-PDKVLLPGT  |
| S_mikata         | 392 | KFVGMYPSPHFSGITEFR-YC-TLKLYFTHLSVSK----            | I-PDKLILPGT  |
| S_bayanus        | 365 | KFVGMYPPEFHSVDDFK-HC-SLKLYFTPLPLSG----             | P-LDRVLVPSV  |
| A_gossypii       | 382 | FIAGLYPNVYEECV-R-GS-SFILYFPLTT-----                | AD-TCEVQDPAK |
| S_castellii      | 312 | KLVGSIPLNLIE-SNLN-AS-PARFFFIPNEWTEGKEGNDEAMIKLLPNY |              |
| K_waltii         | 411 | LVLGLRIND-----ASY-TP-SVVLFFRPESLLD----             | KNDRGPLFIHD  |
| K_Lactis         | 395 | KILGFIPNQYLDPESSLIEDDFLLIYVYTYE-----               | LPLLSAVFVPEY |
| S_kluyveri       | 453 | KFVGMPLPNELQKKVPQK-IS-TLKLYFQPASWDE----            | KVLSSKYLNASK |
| V_polyspora_I    | 306 | KFLNIFPIRFDSLNLK-YW-SLRLYFQPTIEWYD-----            | RNADIIIPNK   |
| V_polyspora_II   | 245 | TIAGTYPSDFKDLSDLK-DT-ILRLYIIPREWET-----            | EAERQILIPNS  |
| L_thermotolerans | 411 | VVFGLRIND-----AAS-SP-SIALYIHAGSLQN-----            | ESVSANLYPYK  |
| Z_rouxii_XP      | 357 | RFAVHPLE-----NLTYFLPEGI-----                       | ETPSHLSPGI   |
| C_glabrata       | 279 | SLQSMSPVGFKSLDDLD-KF-TLRLVFKQKTM-----              | VDELLIPNN    |

OB2

|                  |     |                                                            |            |            |
|------------------|-----|------------------------------------------------------------|------------|------------|
| S_cerevisiae     | 406 | NCIEIIVPTIRERICELFGVLNCQSDK- <b>ISDILLLE</b> --            | KPDRI      | SVEVERIL   |
| S_paradoxus      | 408 | NCIEIIPTRERICELFGVLNCQSSK- <b>ISDILLLK</b> --              | TPGPI      | SVEIERIM   |
| S_mikata         | 434 | NCIEIIPTRERICELFGVLNCQNSM- <b>ISNILLLD</b> --              | KPDIS      | SVEIERVM   |
| S_bayanus        | 407 | NCIEIIPTRERICELFGVLNCQSDK- <b>ISAILLMD</b> --              | KPDIS      | SVEIERIL   |
| A_gossypii       | 421 | NCIEIYSSDIDYVLQYQYDIDHNMDRK-EALILLNSRLDKLEVRISITKAK        |            |            |
| S_castellii      | 359 | NCIEVLVSKFSELKGFISKFTTDFTK-LNHFLI-N--N--                   | KVQVRIVRSK |            |
| K_waltii         | 449 | NCIEILVHITDNVKNSEVIRTESLLELLDIMRYN- <b>VEDKAVTVEVRKTP</b>  |            |            |
| K_Lactis         | 438 | NCYEIAITNVAKFFSKIGVRSYPHSIKNSLLELKEIDNNRYDITTYKKE          |            |            |
| S_kluyveri       | 497 | NCLEVVTNCIDQLLDIFSLSKQPDNR-SLLGDI <b>STVLLYRTFEVKIQKRR</b> |            |            |
| V_polyspora_I    | 348 | NCIEIMVFNLDEFKNLFGTLVNNSES-LSLILF-S--Y--                   | EVSLEIKRSK |            |
| V_polyspora_II   | 288 | NCIEVLILDASEIHKFFGRLVNDSSQ-S-FREVIS-S--T--                 | EFFIRLERAK |            |
| L_thermotolerans | 449 | NCTEVLAYASDSIELNSKLFPAENSAEMLEALRWY- <b>VEDKKVELKVKKSS</b> |            |            |
| Z_rouxii_XP      | 386 | NCIEISSEA-----MPL-E--K-EYTIEIERVE                          |            |            |
| C_glabrata       | 318 | NCCEVVIKNKLEYMETFGRLADTSSK- <b>LRKYL</b> --                | N--G--     | DLNITVKKWK |



|                  |     |                                                                             |
|------------------|-----|-----------------------------------------------------------------------------|
| S_cerevisiae     | 453 | WDND---KTA-----SPGMAVW <b>SLKNI</b> STDTQAQAQV-Q--VPA----                   |
| S_paradoxus      | 455 | WDND---ETI-----SPGI <b>AVW</b> SLKNI <b>STDT</b> QAQA-----PV----            |
| S_mikata         | 481 | WNN <b>D</b> ---ETI-----SPGLTVW <b>SLKNI</b> SVK <b>TQAQ</b> ASA-Q--SPA---- |
| S_bayanus        | 454 | WDND---ETV-----SPGLAVW <b>SLKNI</b> CADTHVQPPA-----PR----                   |
| A_gossypii       | 470 | LFFS-----DSTY <b>SFCWELKALQVNAETLTQF</b> -T--SIK----                        |
| S_castellii      | 403 | F <b>PFKLLKNDTFHAYNKEHAF</b> APIWTL <b>QDIDLLPSKIPKK</b> -K--AVP----        |
| K_waltii         | 498 | YLLT-----DQY <b>FTFSWTLR</b> DV <b>RT</b> EQGLPPKL-A--VIS----               |
| K_Lactis         | 488 | ETIG-----AAK <b>SSK</b> WAL <b>KDV</b> VLSALPTPK-E--VTF----                 |
| S_kluyveri       | 546 | V <b>SMA</b> -----GIFYS <b>FCSW</b> SLTD <b>ISTDS</b> PKKIEE-K--RSQ----     |
| V_polyspora_I    | 392 | <b>WSFD</b> -----KTIF <b>TSVW</b> TLSNM <b>KILR</b> KLEIDN-E--TNQ----       |
| V_polyspora_II   | 332 | LQLE---NSF-----HTFY <b>WTFQ</b> TVNISG <b>QSQNTS</b> IQNLDPSS <b>SSFM</b>   |
| L_thermotolerans | 498 | ILLA-----DGY <b>FTFAW</b> TLVSV <b>KTAGDAPKLS</b> -T--SQT----               |
| Z_rouxii_XP      | 410 | KPLF-----DDK <b>FTLQW</b> IL <b>K</b> SP <b>EP</b> ESE-----                 |
| C_glabrata       | 361 | Y <b>EI</b> -----RGYDS <b>FKW</b> T <b>IEK</b> LDFNPEMPVKE----KV----        |

OB2

|                  |     |                                                                              |
|------------------|-----|------------------------------------------------------------------------------|
| S_cerevisiae     | 486 | -----QSSA-----S---I--DPSRTRMSK <b>MARKDPTIEFCOL</b>                          |
| S_paradoxus      | 484 | -----QSLP-----P---T--NPPRTRMRE <b>MARKDPTIEFCOL</b>                          |
| S_mikata         | 514 | -----KSLP-----P---V--NAPRTKMR <b>KMAEKDPTIEFCHL</b>                          |
| S_bayanus        | 485 | -----ASS-----P---S--NPPRLKMRELAK <b>KDPTIEFREL</b>                           |
| A_gossypii       | 501 | -----MPNPLP-----E--RG--N-----ALSID <b>Q</b>                                  |
| S_castellii      | 446 | -----RLLPST--IANNQDEDLNKILNQ <b>QFERTKND</b> SVIK <b>FEEL</b>                |
| K_waltii         | 529 | -----DAGSQS-----S--QV-ITSSQ <b>ESSQRMPDPLKTFSEL</b>                          |
| K_Lactis         | 518 | -----TEN <b>KFPL</b> RV <b>SNI</b>                                           |
| S_kluyveri       | 577 | -----SSFPVA-----K--GV--T-PLQHR <b>TYRVDPVKTVGEL</b>                          |
| V_polyspora_I    | 423 | -----RLTPTTEDIKNN <b>NGKYKSKIKDDMAW</b> ND <b>KDELIKFEDL</b>                 |
| V_polyspora_II   | 370 | PSR <b>NLLSSSTESIP</b> PTS <b>F--KPQQ-S--TPN</b> KND <b>RKNPSRIDPLIQEKDL</b> |
| L_thermotolerans | 529 | -----SHTPRS-----S--QI-VGSSQ <b>EASQDSLDPKTFGEI</b>                           |
| Z_rouxii_XP      | 432 | -----PPS-----GRTRD <b>QLIWFKDL</b>                                           |
| C_glabrata       | 389 | -----PEQG--KCSNRYDFN--SIN <b>FIDESTRDQVIQFKDM</b>                            |

$\alpha$ A

|                  |     |                                                                                       |
|------------------|-----|---------------------------------------------------------------------------------------|
| S_cerevisiae     | 514 | GLDT-FET <b>KYITMFGMLV</b> SCSFD-KP- <b>AFISFVFS</b> DFTKNDI-V <b>QNYLYD</b>          |
| S_paradoxus      | 512 | ELNN-FET <b>KYVTFMFGMLV</b> SCSFD-KP-S <b>FISFVFT</b> DFTKNDI-V <b>QNYLYD</b>         |
| S_mikata         | 542 | ELNT-FET <b>KYVTFMFGMLV</b> SCSFD-KP-A <b>FVSFVFT</b> DFTTNDI-V <b>QNYLYD</b>         |
| S_bayanus        | 512 | GLGA-FDT <b>KFVTFMFGMLV</b> SCSFD-KP-A <b>FSSFVFT</b> DFTKNDI-T <b>QNYLYD</b>         |
| A_gossypii       | 518 | ---SA-TT <b>SSATIFAM</b> LICARVD-PGSKV <b>HHSFTDFTENLL</b> -IS-CKLD                   |
| S_castellii      | 483 | RLSP-HE <b>VKFTMFGLLV</b> SVTFE-NS-Q <b>YVSLVFTDFTTNSI</b> D <b>QKYLEG</b>            |
| K_waltii         | 559 | SLAG-NQ <b>VEFIRAYALLV</b> AKPF-TS-K <b>MYKFVMTDFTSHPL</b> -NKLSAFD                   |
| K_Lactis         | 531 | -VPS-ASS <b>RYT</b> VI <b>GLAV</b> IVKYT-GG-K <b>TLVLSFTDFTANPK</b> -V-NYGYD          |
| S_kluyveri       | 605 | SVKKE <b>GEVEFVTIFAL</b> MVA <b>AKIN</b> -DP-Y <b>KRFVFTDFTANPL</b> -TGSYTFD          |
| V_polyspora_I    | 462 | RVPI-NE <b>KIFFKT</b> VG <b>MLISCS</b> FT-HP-S <b>FVSLVFTDFTYNSI</b> -P <b>QKYLEF</b> |
| V_polyspora_II   | 415 | VLNE-SE <b>IKYVTMMGL</b> L <b>VSCS</b> FE-HK-S <b>EAKLIFTDFTKNNV</b> -T <b>QNELED</b> |
| L_thermotolerans | 559 | SISG-NE <b>VEFIRTFALL</b> VSA <b>KTF</b> -GS-K <b>MHKFVFTDFTSHPK</b> -NKLSAFD         |
| Z_rouxii_XP      | 448 | K--K-Q <b>DEHYVRMIAL</b> L <b>VSSDPKQ</b> KG-K <b>FASVIFTDFTKNSV</b> -R <b>QYPLEF</b> |
| C_glabrata       | 421 | IIEENT <b>AKFYIVFGYLL</b> AC <b>STD</b> -NS-N <b>YANFVFTDFTTNR</b> KY <b>EQYTFD</b>   |

OB3

$\beta$ 1

$\beta$ 2

|                  |     |                                                                                                                                                      |
|------------------|-----|------------------------------------------------------------------------------------------------------------------------------------------------------|
| S_cerevisiae     | 560 | R <b>YLIDYENKLELN</b> EG <b>FKA</b> IM <b>YKNQ</b> FET <b>FDSKLR</b> KIF <b>NNGLRDLQ</b> NGR---                                                      |
| S_paradoxus      | 558 | R <b>YLIDYESKLELN</b> EG <b>FKA</b> IM <b>YKNQ</b> FET <b>FDTKIRQ</b> IF <b>NKGLSDLR</b> NGR---                                                      |
| S_mikata         | 588 | R <b>YLDVYEAKLELN</b> EG <b>FKA</b> IM <b>YRNQ</b> FET <b>FDSKILNI</b> FN <b>KRLNELQ</b> NGR---                                                      |
| S_bayanus        | 558 | R <b>YLDVYEAKL</b> DL <b>NEG</b> FKA <b>IMYKNQ</b> FE <b>VFD</b> SH <b>IEKI</b> FG <b>KRLKDLQ</b> NGN---                                             |
| A_gossypii       | 561 | P <b>YLNDYCNRL</b> KATE <b>CIYV</b> KS <b>YPEY</b> I <b>HNL</b> DAY <b>TLRH</b> Y <b>NRRLV</b> D <b>CH</b> NGR---                                    |
| S_castellii      | 529 | N <b>YLIDPIVR</b> M <b>NGDQ</b> G <b>FRVIM</b> Y <b>PEH</b> FE <b>IF</b> NR <b>NVAKV</b> FG <b>STLKD</b> IL <b>NGR</b> ---                           |
| K_waltii         | 605 | S <b>FLGSYVHRLRQ</b> E <b>MAFP</b> VI <b>YNDH</b> Y <b>FEF</b> KS <b>LKRAI</b> G <b>REMS</b> E <b>LF</b> SGN---                                      |
| K_Lactis         | 575 | S <b>FLGSFQERIP</b> ENE <b>HVHALI</b> Y <b>LN</b> RV <b>ESL</b> NE <b>KLQSI</b> IK <b>MGLME</b> CAD <b>KG</b> ---                                    |
| S_kluyveri       | 652 | P <b>FICSYHN</b> RIS <b>STET</b> L <b>HSVM</b> Y <b>DDEY</b> G <b>KFLNR</b> IT <b>QCMR</b> CK <b>FEDL</b> FN <b>VK</b> ---                           |
| V_polyspora_I    | 508 | R <b>FLIDYDNKLEL</b> DE <b>GYR</b> VI <b>YHNQ</b> FE <b>FDEE</b> V <b>KVY</b> G <b>YSTRE</b> MI <b>KHG</b> ---                                       |
| V_polyspora_II   | 461 | R <b>FLIDYNNKID</b> IDE <b>GFRV</b> VI <b>YLNQ</b> FE <b>KFEKS</b> IE <b>EAYG</b> YE <b>IKK</b> MF <b>IND</b> ---                                    |
| L_thermotolerans | 605 | S <b>FLGSYTNRLPQ</b> D <b>MAFP</b> VI <b>YNDH</b> F <b>REFT</b> TR <b>LQ</b> R <b>H</b> T <b>GYN</b> FN <b>QLY</b> SGN---                            |
| Z_rouxii_XP      | 493 | K <b>FVVHYE</b> KK <b>LDE</b> DE <b>GIR</b> TL <b>MYLDRY</b> REF <b>GK</b> K <b>IQNV</b> Y <b>NK</b> TL <b>DQ</b> TY <b>APD</b> ---                  |
| C_glabrata       | 469 | R <b>YINDYNTK</b> L <b>DH</b> D <b>Q</b> S <b>FRV</b> IS <b>SYNH</b> FE <b>EN</b> FM <b>KV</b> K <b>AKY</b> G <b>KDL</b> NAM <b>VN</b> ENS <b>QI</b> |

$\beta$ 3

$\alpha$ B



|                  |     |                                 |                          |
|------------------|-----|---------------------------------|--------------------------|
| S_cerevisiae     | 738 | LLDSS-----ARLPRPQQTHKSN         | TLYSCEGRITATE-----       |
| S_paradoxus      | 738 | LLNSF-----ARC--PQQTHKSN         | TLYNCEGRIVATE-----       |
| S_mikata         | 771 | LLNSL-----SRCPHRQIHKTS          | TLYSCRGRITATE-----       |
| S_bayanus        | 640 | -----                           | -----                    |
| A_gossypii       | 735 | ELQSN-----PL-----               | SSEGVLYLLKGIKILSTV-----  |
| S_castellii      | 737 | LLNVL-----Q-----                | DDEPVI FRVSGKLIINVE----- |
| K_waltii         | 786 | VLHKT-----RG-----               | VDGRQIYHITGKVVAAV-----   |
| K_Lactis         | 769 | DIKNN-----VQ-----               | MDHK-DIKVTAKILSIF-----   |
| S_kluyveri       | 845 | ALNTI-----EK-----               | LTPKKVYHVQGVVDIT-----    |
| V_polyspora_I    | 671 | VLQSA-----TD-----               | SENKNDYILRIKVL SVE-----  |
| V_polyspora_II   | 656 | ELNL-----                       | ANPKDNIVYEIDCQIMNIK----- |
| L_thermotolerans | 787 | VLYGL-----DA-----               | TDSSHLELRAKVVAAI-----    |
| Z_rouxii_XP      | 632 | ELEKATDDFLETNSSSQISS-SLQFDQECFS | INAKILYFFTNDNPINHW-----  |
| C_glabrata       | 622 | QLNHL-----Q-----                | HLTPKIYVLNVYIIDVE-----   |

**αA** ● ● ● ● ● **β1** ●

|                  |     |                              |                         |
|------------------|-----|------------------------------|-------------------------|
| S_cerevisiae     | 769 | -----YHASDLCFHITNELPLLQTRGI  | -AP-ERVLIQIHITTSKNFAYFF |
| S_paradoxus      | 767 | -----HHASGLCFHITNELPLSQTRIP  | -AP-QRVLQIHITTSKNFAYFF  |
| S_mikata         | 802 | -----YTASDICFHITNEFSLSQGRSA  | -DS-QKVLKLIHITTPKNFAYFF |
| S_bayanus        | 640 | -----                        | -----                   |
| A_gossypii       | 759 | -----VDSSKATIYITNDAKL--QEEV  | -SV-RGFLRLQILCEANVSYFC  |
| S_castellii      | 760 | -----YHPSYLALTIITNDF-A-KDAI  | -EW-TRILKIEVFSSENIRYFF  |
| K_waltii         | 810 | -----QTQQLLTFYITNDYV-S-QDML  | -DP-ERVLRVEIPGAQNVEYFF  |
| K_Lactis         | 792 | -----DNGNVTIYLTRSGMVGTOCTI   | ENPFEEELKVKQIWGRQNLTLFF |
| S_kluyveri       | 869 | -----QDDDCLSFLITNDLIS--EGVL  | -DP-TRILKVDIICQDNLDYFY  |
| V_polyspora_I    | 695 | -----NDKELIRLIVTDDL-D-E-QEFI | -NP-NNILNIDILNQT-LDTIN  |
| V_polyspora_II   | 679 | -----YNMSYLSILVTNDFVT--NNFI  | -DP-TRMLRIDITNVDNLKQLL  |
| L_thermotolerans | 811 | -----RTGELLAFYVTNDWI-S-QDML  | -DP-TRVLRVEIPGRSNMDYFF  |
| Z_rouxii_XP      | 680 | SLLVAIEDNSTKTNVISG---D-HRFV  | -DP-RSILRIEIFCKENLEYFT  |
| C_glabrata       | 645 | ----IVYDQEIIRIKVVNELPMV-GKYV | -PP-VDILEVYIITCKEEVQNEL |

**β1** ● ● ● ● ● **β2** ● ● ● ● ● **β3** ● ● ● ● ● **αB**

|                  |     |                               |                           |
|------------------|-----|-------------------------------|---------------------------|
| S_cerevisiae     | 811 | NRSSAYL-----QRQPL-----        | EKEYTQLAQFLGHSFKENITSSLT  |
| S_paradoxus      | 809 | NRSAYL-----QRQPL-----         | EKEYAQLAQFLGHSFKENITSSLK  |
| S_mikata         | 844 | NRPNAYI-----QRQSL-----        | EEICTQLTQFLGHSFQENITSSYK  |
| S_bayanus        | 640 | -----TQDL-----                | DGRHTQLAQFLGHPKFNITSSRL   |
| A_gossypii       | 799 | GADEA-----                    | STDVLAQAINLRAFKFYLLFGEV   |
| S_castellii      | 800 | NAGVEPPLVEMSTQSQVLSTENAINIEDN | LNILKGFVKGFEFSFKITKGTL    |
| K_waltii         | 850 | GANAGRQ-----PYHGI-----        | SARDPQLQPMIGEIFTFRIVAFSV  |
| K_Lactis         | 836 | GNPNYS-----                   | YKREELTACTGSIVDFTLIPRVL   |
| S_kluyveri       | 909 | NQRDYK-----                   | AFQNDLTLVKGILAFRLSRVLI    |
| V_polyspora_I    | 734 | ESLNF---M-----ES-----         | INNIRLRKLIIDKTIELQITKCLK- |
| V_polyspora_II   | 719 | DIQISET-----QLTDI IKDK---     | SNPIIAKIDDLINESVVLRIKRKLV |
| L_thermotolerans | 851 | GTYASQE-----TRPDL-----        | AARDAQLGTMIGETFTFRIVTEAV  |
| Z_rouxii_XP      | 723 | ASQLSK-----                   | TDSILQQLDQYRGRTCKLRVKRGI  |
| C_glabrata       | 687 | GDEALT-----                   | MDIFTPLINETSRLRVFQ---     |

**αC** **β4**

|                  |     |                            |                           |
|------------------|-----|----------------------------|---------------------------|
| S_cerevisiae     | 847 | LFPDTTVALQIWCPIECTFRELOQQ  | LAHPKVAAAPDSGSL---DCAINAT |
| S_paradoxus      | 845 | FLPGTTMTLQIWCPIECTFRELOQQ  | LAHLKVAAAPDSGSL---GCAITAT |
| S_mikata         | 880 | LLPETALALQIWCPIECTLRELOQQ  | LAHLKAATTPDSGSL---GYAITAA |
| S_bayanus        | 668 | RLXXXXXXXXLQIWCPIECTFQELQQ | QAYTAAGSAGSGSPRGIN        |
| A_gossypii       | 826 | QI-SPSKTARVWCPVECSIEELNSQL | QL-S-----                 |
| S_castellii      | 850 | KL-FTNIGVSVWCPVEYTLLEEMKG  | QMLLRHDRDAKDSK-----       |
| K_waltii         | 886 | PV-SPQRNLRIWCPIECTIQEMKCE  | LAARTAQS-----             |
| K_Lactis         | 865 | RV-NEYLYIKIWCPIYATLESLLI   | HSRLEY-----               |
| S_kluyveri       | 938 | AV-SSKKRLFAYWPVECTMEEMKS   | QLQK-Q-----               |
| V_polyspora_I    | 764 | -I--KDSKLLLWTPANHSLKKILS   | Q-----                    |
| V_polyspora_II   | 760 | QL-SLNSKLAIWNPYTCTSNKHIV   | DQYSENVQ-----             |
| L_thermotolerans | 887 | PV-SPSRFLRTWCPVECTIQELSYE  | LAARRGQA-----             |
| Z_rouxii_XP      | 754 | TL-RSQIALLVWCPIELTLEELE    | VKLV-----                 |
| C_glabrata       | 711 | RP-SKTDRIIRWSPICECTIQELRL  | QRMFLRD-----              |

● ● **β5** **αD**

OB4

|                  |     |                                                 |
|------------------|-----|-------------------------------------------------|
| S_cerevisiae     | 894 | VNPLRLLAAQNGVTVKKEEDNDDDDAG-----AVPTS           |
| S_paradoxus      | 892 | VNPLRLLAAQNGVTVKKEEDNDDDDAGAVSASLDMGAAKCGGAKLQ  |
| S_mikata         | 927 | VNPPRFLAAQDGVTVKKEEDNGDEAGTFSSASWDTIGAAQRGGAKFQ |
| S_bayanus        | 718 | ADHPRLLAALDGVTVKREDTDDAVT-----AGFCPPRAT         |
| A_gossypii       | 854 | -----DN-LVKLEQH-----TCNN                        |
| S_castellii      | 888 | -----PLTSSHG-MVKQETHSL-----VEIID                |
| K_waltii         | 918 | -----SSVVKRE-----DA                             |
| K_Lactis         | 894 | -----DNDTLKYENL-----SDID                        |
| S_kluyveri       | 966 | -----LTVSVKQEQID-----LTDM                       |
| V_polyspora_I    | 786 | -----SS                                         |
| V_polyspora_II   | 791 | -----VSNVITVKK-----EQ                           |
| L_thermotolerans | 919 | -----AARVKLE-----DS                             |
| Z_rouxii_XP      | 779 | -----EES                                        |
| C_glabrata       | 742 | -----TIKVEET-----LSLTQ                          |

OB4

**Figure S1** Alignment of large Cdc13 homologues from *Saccharomyces* and *Kluyveromyces spp.* Multiple Cdc13 homologues are culled from the SGD and NCBI databases, aligned using the T-COFFEE server (<http://www.igs.cnrs-mrs.fr/Tcoffee/tcoffee.cgi/index.cgi>) and displayed using Boxshade ([http://www.ch.embnet.org/software/BOX\\_form.html](http://www.ch.embnet.org/software/BOX_form.html)). Structure based assignment of the  $\alpha$  helices and  $\beta$  strands within the first, the third, and the last OB folds are indicated by red and blue boxes, respectively, while the predicted  $\alpha$  helices and  $\beta$  strands of *ScCdc13* are indicated by pink and green boxes. In *ScCdc13*<sub>OB1</sub>, red dots denote the *S. cerevisiae* residues important for dimerization (Ile87, Leu91, and Tyr95) whereas the pink dot denotes the less important residue Leu84 as shown in the gel filtration, yeast two-hybrid and co-IP assays; yellow dots denote the residues important for dimerization indicated by the crystal structure; and blue dots denote the residues involved in the Cdc13<sub>OB1</sub>-Pol<sub>CBM</sub> interaction. In *CgCdc13*<sub>OB4</sub>, green dots denote the *C. glabrata* residues important for dimerization. The accession codes for the homologues are as follows: *S. cerevisiae* (NP\_010061.1); *S. paradoxus* (spar429-g20.1); *S. mikata* (smik194-g3.1); *S. bayanus* (sbayc535-g11.1); *A. gossypii* (NP\_982792.1); *C. glabrata* (XP\_446604.1); *S. castellii* (Scas677.11); *K. waltii* (Kwal23.4628); *K. lactis* (XP\_456019.1); *S. kluyveri* (SAKL0E13266g); *V. polyspora I* (XP\_001645836); *V. polyspora II* (XP\_001642283); *L. thermotolerans* (XP\_002552111); *Z. rouxii* (XP\_002496083).

## Supplementary Figure S1
