# Supplementary material
Source: PubMed Central journal article supplement (PMC3193437)
Supplement: cr2010138x2.pdf [file cr2010138x2.pdf]

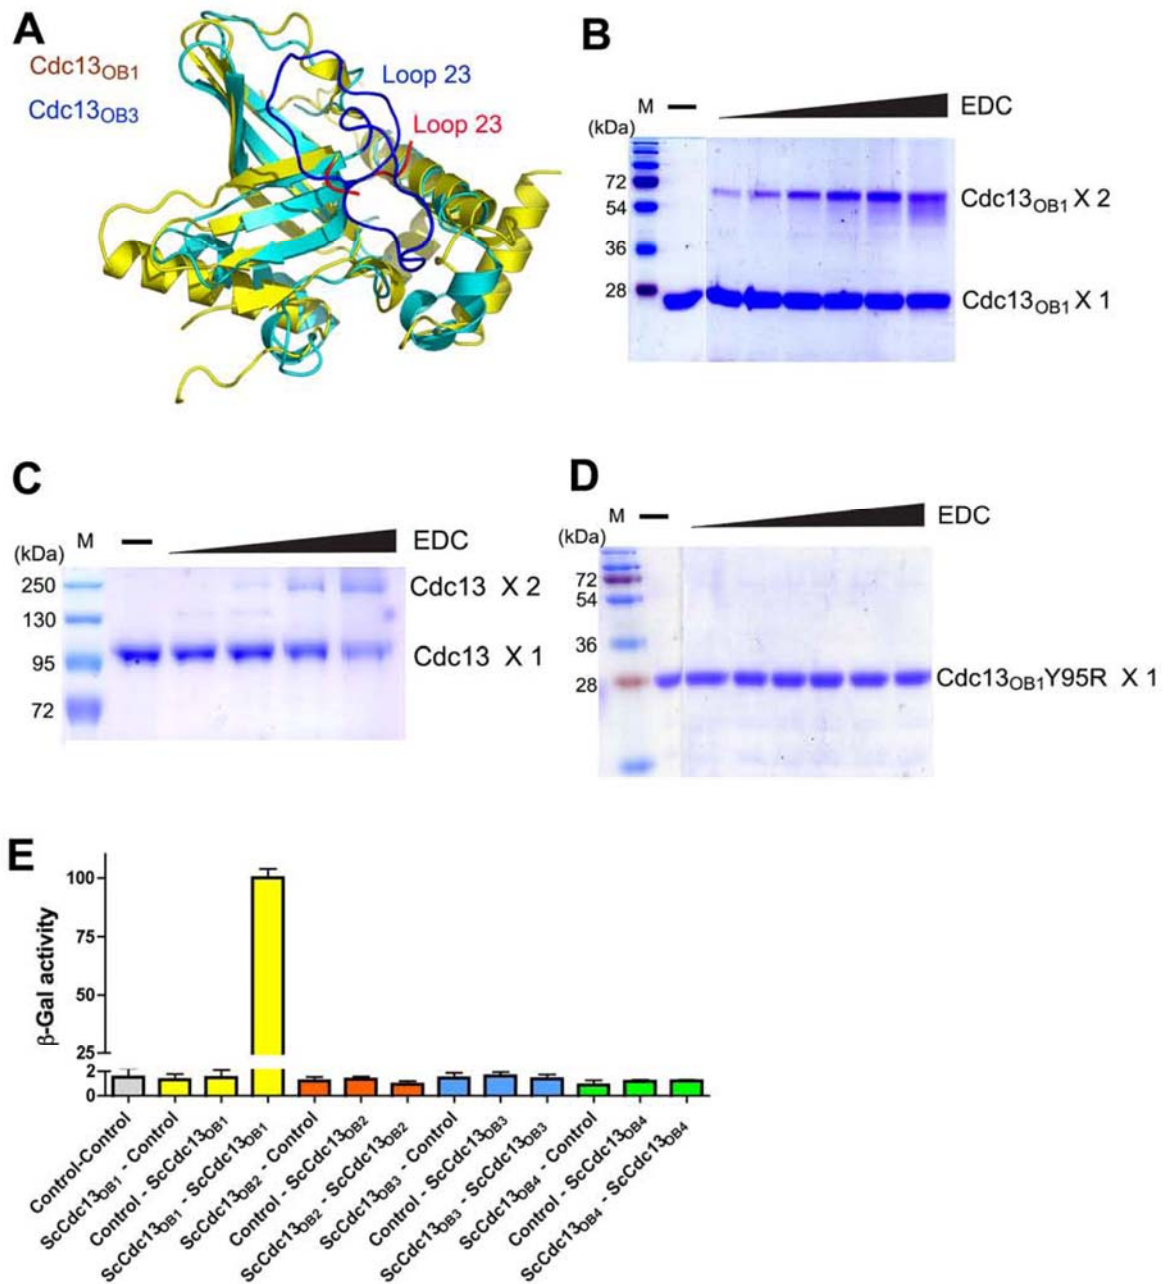

**Figure S2** Structural and biochemical characterization of ScCdc13<sub>OB1</sub> dimer. **(A)** Superposition of the structures of ScCdc13<sub>OB1</sub> and ScCdc13<sub>OB3</sub> (PDB ID: 1KXL). ScCdc13<sub>OB1</sub> and ScCdc13<sub>OB3</sub> are in ribbon representation and colored in yellow and cyan, respectively. ScCdc13<sub>OB3</sub> contains a long loop L<sub>23</sub> (in blue) between strands  $\beta$ <sub>2</sub> and  $\beta$ <sub>3</sub>, whereas L<sub>23</sub> in ScCdc13<sub>OB1</sub> is short and partially disordered in the crystal structure. **(B)** SDS-PAGE of the cross-linked product of Cdc13<sub>OB1</sub>. With increasing concentrations of the cross-linking reagent EDC, more Cdc13<sub>OB1</sub> was cross-linked and migrated in the gel as a Cdc13<sub>OB1</sub> dimer. **(C)** SDS-PAGE of the cross-linked product of full-length Cdc13. With increasing concentrations of the cross-linking reagent EDC, more Cdc13 was cross-linked and migrated in the gel as a Cdc13 dimer.

**(D)** SDS-PAGE of the cross-linked product of the monomeric Cdc13<sub>OB1</sub> Y95R mutant. There was no cross-linked product formed even at the highest concentration of the cross-linking reagent EDC. **(E)** Self-association of each OB fold of Cdc13 was examined in yeast two-hybrid assays. The color scheme is the same as in Figure 1. Dimeric interaction was measured as  $\beta$ -galactosidase activity. Data are averages of three independent  $\beta$ -galactosidase measurements normalized to the value produced by the dimeric interaction of the OB1 domain, arbitrarily set to 100.

## Supplementary Figure S2
