# Supplementary material
Source: PubMed Central journal article supplement (PMC3193437)
Supplement: cr2010138x3.pdf [file cr2010138x3.pdf]

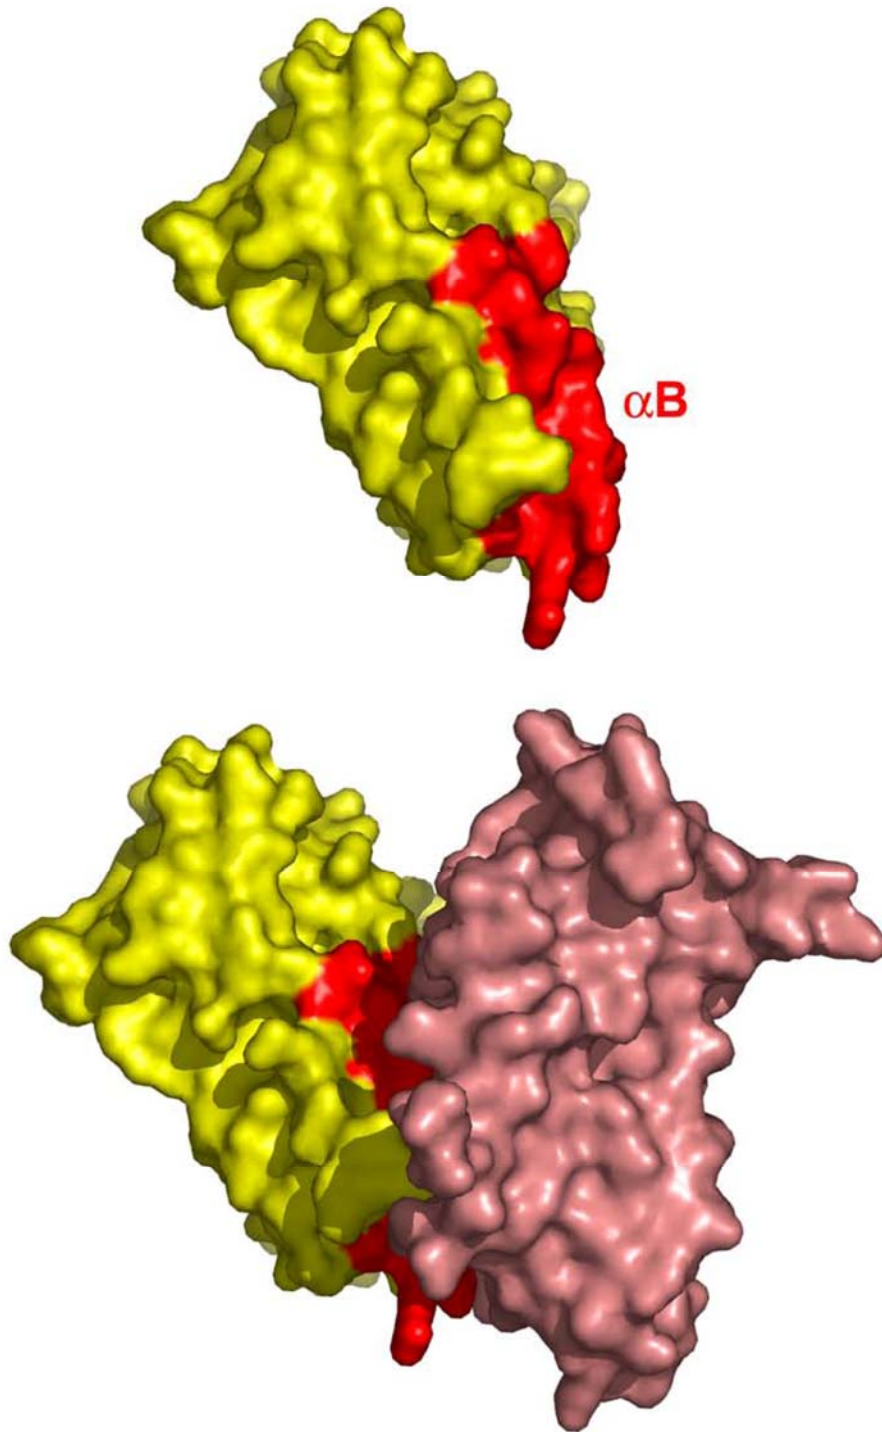

**Figure S3** Comparison between monomer Cdc13<sub>OB1</sub> (upper panel) and dimer Cdc13<sub>OB1</sub> (lower panel) reveals that dimerization of Cdc13<sub>OB1</sub> almost completely buries the  $\alpha B$  helix at the dimeric interface. The two Cdc13<sub>OB1</sub> molecules are in the surface representation and colored in yellow and salmon, respectively. Helix  $\alpha B$  in one Cdc13<sub>OB1</sub> (in yellow) is colored in red.

### Supplementary Figure S3
