# Supplementary material
Source: PubMed Central journal article supplement (PMC3193437)
Supplement: cr2010138x5.pdf [file cr2010138x5.pdf]

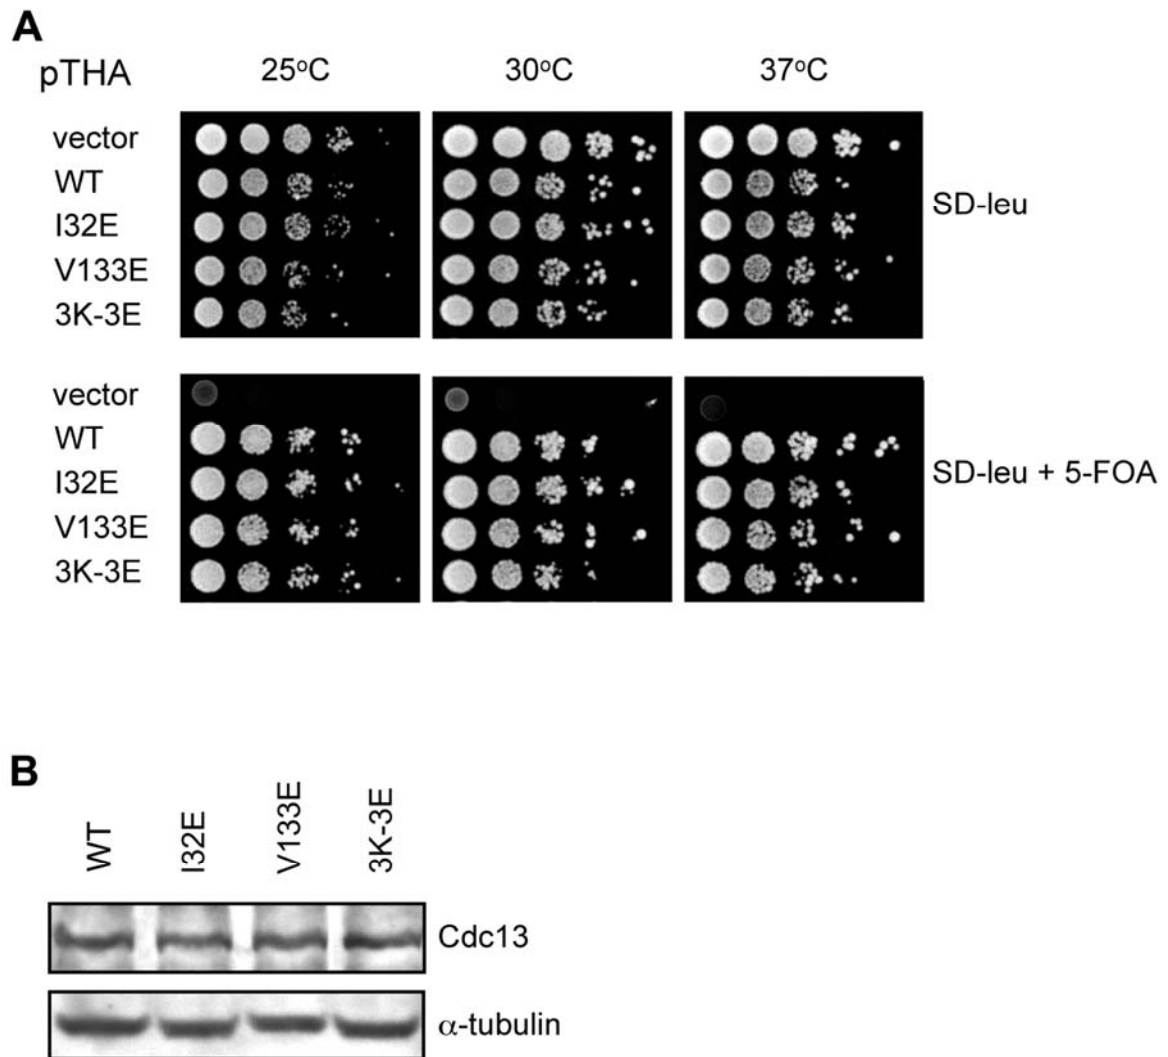

**Figure S5** *In vivo* functional analysis of the Cdc13-Pol1 interaction. **(A)** Complementation of a *cdc13* $\Delta$  mutant by *CDC13* point mutants. Yeast strain YJL501 (*cdc13* $\Delta$ ::HIS3/YEP24-*CDC13*) carrying plasmid pTHA-NLS (vector) or pTHA-NLS-*CDC13* mutants was spotted in 10-fold serial dilutions on SD-Leu plates or plates containing 5-FOA and incubated at 25°C, 30°C, and 37°C until colonies formed on the plates. **(B)** Western analysis of *cdc13* mutants that disrupt the Cdc13-Pol1 interaction. Extracts prepared from the indicated strains were analyzed by SDS-PAGE and western blotting using an anti-Cdc13 antiserum (Hsu *et al.*, 2004).

## Supplementary Figure S5

## Supplementary references

Dionne, I., and Wellinger, R.J. Cell Cycle-regulated generation of single-stranded G-rich DNA in the absence of telomerase. *Proc. Natl. Acad. Sci. USA* 1996; **93**:13902-13907.

Fitzpatrick, D.A., Logue, M.E., Stajich, J.E., and Butler, G. A fungal phylogeny based on 42 complete genomes derived from supertree and combined gene analysis. *BMC Evol Biol* 2006; **6**:99.

Hsu, C.L., Chen, Y.S., Tsai, S.Y., Tu, P.J., Wang, M.J., and Lin, J.J. Interaction of *Saccharomyces* Cdc13p with Pol1p, Imp4p, Sir4p and Zds2p is involved in telomere replication, telomere maintenance and cell growth control. *Nucleic Acids Res* 2004; **32**:511-521.
