# Supplementary material
Source: PubMed Central journal article supplement (PMC3193437)
Supplement: cr2010138x7.pdf [file cr2010138x7.pdf]

**Table S1 Data collection, phasing and refinement statistics.**

|                                                     | <i>ScCdc13</i> <sub>OBI</sub>       | <i>ScCdc13</i> <sub>OBI</sub>       | <i>ScCdc13</i> <sub>OBI</sub> - <i>Poll</i> <sub>CBM</sub> |
|-----------------------------------------------------|-------------------------------------|-------------------------------------|------------------------------------------------------------|
| <b>Data collection</b>                              | <i>Hg peak</i>                      | <i>Native</i>                       | <i>Native</i>                                              |
| Space group                                         | <i>P2<sub>1</sub>2<sub>1</sub>2</i> | <i>P2<sub>1</sub>2<sub>1</sub>2</i> | <i>P2<sub>1</sub>2<sub>1</sub>2<sub>1</sub></i>            |
| Cell dimensions                                     |                                     |                                     |                                                            |
| <i>a, b, c</i> (Å)                                  | 62.441, 69.024, 52.064              | 62.515, 68.641, 52.815              | 60.393, 85.090, 60.376                                     |
| $\alpha, \beta, \gamma$ (°)                         | 90, 90, 90                          | 90, 90, 90                          | 90, 90, 90                                                 |
| Wavelength (Å)                                      | 1.12721                             | 0.97856                             | 0.97872                                                    |
| Resolution (Å)                                      | 50-3.3                              | 50-2.5                              | 100-2.4                                                    |
| <i>R</i> <sub>merge</sub>                           | 0.085(0.263)*                       | 0.063(0.313)*                       | 0.074(0.393)*                                              |
| <i>I</i> / $\sigma$ <i>I</i>                        | 27.3(6.0)*                          | 41.8(3.6)*                          | 42.7(2.9)*                                                 |
| Completeness (%)                                    | 93.2(72.0)*                         | 96.4(76.8)*                         | 97.3(83.1)*                                                |
| Redundancy                                          | 8.7(7.1)*                           | 6.6(4.7)*                           | 6.9(3.9)*                                                  |
| <b>Phasing</b>                                      |                                     |                                     |                                                            |
| Figure of Merit (anomalous)                         | 0.24893(acen)                       |                                     |                                                            |
|                                                     | 0.08433(cent)                       |                                     |                                                            |
| Phasing power (anomalous)                           | 0.750                               |                                     |                                                            |
| <b>Refinement</b>                                   |                                     |                                     |                                                            |
| Resolution (Å)                                      |                                     | 50-2.5                              | 50-2.4                                                     |
| No. reflections                                     |                                     | 7498                                | 9706                                                       |
| <i>R</i> <sub>work</sub> / <i>R</i> <sub>free</sub> |                                     | 0.211/0.267                         | 0.224/0.264                                                |
| No. atoms                                           |                                     |                                     |                                                            |
| Protein                                             |                                     | 1608                                | 1741                                                       |
| Water                                               |                                     | 35                                  | 34                                                         |
| Wilson B-factors (Å <sup>2</sup> )                  |                                     | 61.9                                | 55.5                                                       |
| B-factors (Å <sup>2</sup> )                         |                                     |                                     |                                                            |
| Protein                                             |                                     | 66.293                              | 37.844                                                     |
| Water                                               |                                     | 61.067                              | 43.306                                                     |
| R.m.s deviations                                    |                                     |                                     |                                                            |
| Bond lengths (Å)                                    |                                     | 0.006074                            | 0.004976                                                   |
| Bond angles (°)                                     |                                     | 1.23652                             | 1.15154                                                    |
| B-factors (Å <sup>2</sup> )                         |                                     | 5.782                               | 5.821                                                      |

\*The numbers in parentheses represent the highest resolution shell numbers.
